# Supplementary material for: The role of HnrnpF/H as a driver of oligoteratozoospermia
Source: PubMed Central journal article supplement (PMC11292545; doi:10.1016/j.isci.2024.110198), 2024-06-06
Supplement: mmc1.pdf [file mmc1.pdf]

iScience, Volume 27

## **Supplemental information**

### **The role of HnrnpF/H as a driver of oligoteratozoospermia**

**Jacob K. Netherton, Rachel A. Ogle, Benjamin R. Robinson, Mark Molloy, Christoph Krisp, Tony Velkov, Franca Casagrande, Nicole Dominado, Ana Izabel Silva Balbin Villaverde, Xu Dong Zhang, Gary R. Hime, and Mark A. Baker**

**Table S1. Semen parameters used for this study, related to Table 1.**

A) Semen analysis of individual infertile donors.

B) Semen analysis of individual fertile donors.

**Panel A**

| Infertile |          |                             |                       |
|-----------|----------|-----------------------------|-----------------------|
| VOLUME    | MOTILITY | COUNT (10 <sup>6</sup> /mL) | MORPHOLOGY (% Normal) |
| 4.0       | 32       | 33.75                       | 6                     |
| 4.0       | 53       | 45.03                       | 5                     |
| 4.0       | 49       | 13                          | 8                     |
| 5.0       | 39       | 20.7                        | 7                     |
| 3.8       | 53       | 14.145                      | 4                     |
| 2.5       | 53       | 42.9                        | 7                     |
| 4.5       | 37       | 8.05                        | 7                     |
| 2.5       | 45       | 36.63                       | 6                     |
| 4.0       | 44       | 5.535                       | 4                     |
| 5.5       | 39       | 18.9                        | 4                     |
| 1.5       | 45       | 33.75                       | 4                     |

**Panel B**

| Fertile |          |                             |                       |
|---------|----------|-----------------------------|-----------------------|
| VOLUME  | MOTILITY | COUNT (10 <sup>6</sup> /mL) | MORPHOLOGY (% Normal) |
| 5       | 66       | 128                         | 29                    |
| 8       | 77       | 72                          | 25                    |
| 3       | 69       | 227                         | 39                    |
| 2       | 81       | 145                         | 50                    |
| 3       | 61       | 224                         | 35                    |
| 5       | 63       | 340                         | 24                    |
| 3.5     | 83       | 190                         | 47                    |
| 0.5     | 53       | 164                         | 30                    |
| 1.5     | 88       | 186                         | 47                    |
| 4       | 75       | 138                         | 32                    |

**Table S3. Gene ontology analysis, related to Figures 1 and 2.**

**A) Shows the Sub-cellular compartment.**

**B) Shows the Biological Process.**

**c) Shows the Molecular Function of changing proteins.**

**Panel A**

| <b>Sub Cellular compartment</b> | <b># Proteins</b> | <b>%</b> | <b>P-Value</b> | <b>Benjamaini-corrected</b> |
|---------------------------------|-------------------|----------|----------------|-----------------------------|
| Mitochondrion                   | 75                | 20.3     | 2.60E-18       | 1.20E-16                    |
| Nucleosome core                 | 17                | 4.6      | 1.10E-11       | 2.60E-10                    |
| Cytoplasm                       | 161               | 43.5     | 4.90E-11       | 7.50E-10                    |
| Proteasome                      | 10                | 2.7      | 6.40E-07       | 7.30E-06                    |
| Cilium                          | 17                | 4.6      | 1.80E-04       | 1.60E-03                    |
| Mitochondrion inner membrane    | 18                | 4.9      | 2.30E-04       | 1.80E-03                    |
| Flagellum                       | 10                | 2.7      | 8.50E-04       | 5.60E-03                    |
| Cytoskeleton                    | 41                | 11.1     | 2.40E-03       | 1.40E-02                    |
| Intermediate filament           | 7                 | 1.9      | 3.40E-03       | 1.60E-02                    |
| Dynein                          | 5                 | 1.4      | 3.60E-03       | 1.60E-02                    |
| CF(1)                           | 3                 | 0.8      | 5.00E-03       | 2.10E-02                    |
| Chromosome                      | 20                | 5.4      | 1.60E-02       | 6.10E-02                    |
| Virion                          | 5                 | 1.4      | 1.70E-02       | 6.10E-02                    |
| Cytoplasmic vesicle             | 21                | 5.7      | 3.90E-02       | 1.30E-01                    |
| Keratin                         | 7                 | 1.9      | 8.40E-02       | 2.60E-01                    |

**Panel B**

| <b>Biological Process</b>                                       | <b># Proteins</b> | <b>%</b> | <b>P-Value</b> | <b>Benjamini-corrected</b> |
|-----------------------------------------------------------------|-------------------|----------|----------------|----------------------------|
| RNA binding                                                     | 82                | 4.6      | 1.20E-07       | 8.40E-06                   |
| structural constituent of chromatin                             | 16                | 4.3      | 3.40E-10       | 1.00E-07                   |
| unfolded protein binding                                        | 17                | 4.6      | 2.80E-09       | 5.50E-07                   |
| protein domain specific binding                                 | 22                | 5.9      | 8.70E-09       | 1.30E-06                   |
| protein binding                                                 | 284               | 76.8     | 2.20E-08       | 2.60E-06                   |
| chaperone binding                                               | 14                | 3.8      | 1.30E-07       | 1.30E-05                   |
| protein heterodimerization activity                             | 23                | 6.2      | 2.40E-06       | 2.00E-04                   |
| structural molecule activity                                    | 16                | 4.3      | 3.90E-06       | 2.90E-04                   |
| structural constituent of ribosome                              | 15                | 4.1      | 1.40E-05       | 9.30E-04                   |
| cadherin binding                                                | 19                | 5.1      | 3.20E-05       | 1.90E-03                   |
| protein binding involved in protein folding                     | 8                 | 2.2      | 4.30E-05       | 2.10E-03                   |
| identical protein binding                                       | 56                | 15.1     | 4.30E-05       | 2.10E-03                   |
| ATP binding                                                     | 52                | 14.1     | 4.70E-05       | 2.10E-03                   |
| ADP binding                                                     | 7                 | 1.9      | 4.90E-05       | 2.10E-03                   |
| ubiquitin protein ligase binding                                | 16                | 4.3      | 8.30E-04       | 3.30E-02                   |
| heat shock protein binding                                      | 7                 | 1.9      | 1.00E-03       | 3.90E-02                   |
| magnesium ion binding                                           | 13                | 3.5      | 1.50E-03       | 5.30E-02                   |
| flavin adenine dinucleotide binding                             | 7                 | 1.9      | 1.70E-03       | 5.60E-02                   |
| serine-type carboxypeptidase activity                           | 3                 | 0.8      | 3.40E-03       | 1.00E-01                   |
| oxidoreductase activity                                         | 12                | 3.2      | 3.70E-03       | 1.10E-01                   |
| catalytic activity                                              | 9                 | 2.4      | 4.50E-03       | 1.20E-01                   |
| pyruvate dehydrogenase (NAD <sup>+</sup> ) activity             | 3                 | 0.8      | 5.00E-03       | 1.20E-01                   |
| L-lactate dehydrogenase activity                                | 3                 | 0.8      | 5.00E-03       | 1.20E-01                   |
| proton-transporting ATP synthase activity, rotational mechanism | 4                 | 1.1      | 5.00E-03       | 1.20E-01                   |
| MHC class I protein binding                                     | 4                 | 1.1      | 5.80E-03       | 1.30E-01                   |
| nuclear import signal receptor activity                         | 4                 | 1.1      | 5.80E-03       | 1.30E-01                   |
| peroxiredoxin activity                                          | 3                 | 0.8      | 6.90E-03       | 1.50E-01                   |
| ligase activity                                                 | 5                 | 1.4      | 7.70E-03       | 1.60E-01                   |

**Panel C**

| <b>Molecular function</b> | <b># Proteins</b> | <b>%</b> | <b>P-Value</b> | <b>Benjamini-corrected</b> |
|---------------------------|-------------------|----------|----------------|----------------------------|
| Isomerase                 |                   | 4.6      | 1.20E-07       | 8.40E-06                   |
| Oxidoreductase            | 32                | 8.6      | 4.50E-06       | 1.60E-04                   |
| Chaperone                 | 18                | 4.9      | 8.20E-06       | 1.90E-04                   |
| Ligase                    | 14                | 3.8      | 2.50E-05       | 4.30E-04                   |
| Ribonucleoprotein         | 19                | 5.1      | 8.50E-05       | 1.20E-03                   |
| Aminoacyl-tRNA synthetase | 7                 | 1.9      | 1.50E-04       | 1.80E-03                   |
| Ribosomal protein         | 14                | 3.8      | 2.30E-04       | 2.30E-03                   |
| tRNA-binding              | 4                 | 1.1      | 2.10E-02       | 1.50E-01                   |
| Elongation factor         | 4                 | 1.1      | 2.10E-02       | 1.50E-01                   |
| Viral nucleoprotein       | 4                 | 1.1      | 2.10E-02       | 1.50E-01                   |
| Antioxidant               | 3                 | 0.8      | 3.40E-02       | 2.20E-01                   |
| Carboxypeptidase          | 4                 | 1.1      | 4.60E-02       | 2.70E-01                   |
| Motor protein             | 7                 | 1.9      | 7.10E-02       | 3.80E-01                   |
| Peroxidase                | 3                 | 0.8      | 9.70E-02       | 4.90E-01                   |

**Figure S1. R-Script for identifying protein isoforms, related to Fig. 3.**

```
# choose Swath library text file
df = read.table(file=file.choose(), header = T)
df1 = df[,c(1:2)]

library(dplyr)
IsoGroup = df1 %>% group_by(Sequence) %>%
  summarise(ProteinGroup = paste(Protein_Name, collapse=","))

write.table(IsoGroup, file = "IsoGroup.txt", sep = "\t", quote = F, row.names = F, col.names = F)

--
```
